# Supplementary material for: A crossbred reference population can improve the response to genomic selection for crossbred performance
Source: Springer Nature journal article supplement (doi:10.1186/s12711-015-0155-z), 2015-09-29
Supplement: MOESM1 [file 12711_2015_155_MOESM1_ESM.pdf]

**Additional file 1:**

**Partitioning accuracies of breeding values due to additive and dominance effects for Scenario 1 and Scenario 5.**

**Partitioning accuracies of breeding values due to additive and dominance effects**

| Breed A | G    | Scenario 1 |      |      | Scenario 5 |      |      |
|---------|------|------------|------|------|------------|------|------|
|         |      | BV         | Add  | Dom  | BV         | Add  | Dom  |
|         | 1    | 0.65       | 0.69 | 0.19 | 0.80       | 0.57 | 0.36 |
|         | 2    | 0.49       | 0.56 | 0.18 | 0.61       | 0.40 | 0.22 |
|         | 3    | 0.38       | 0.50 | 0.20 | 0.50       | 0.37 | 0.19 |
|         | 4    | 0.30       | 0.47 | 0.19 | 0.43       | 0.34 | 0.19 |
|         | 5    | 0.26       | 0.44 | 0.19 | 0.39       | 0.32 | 0.24 |
|         | Mean | 0.42       | 0.53 | 0.19 | 0.54       | 0.40 | 0.24 |

  

| Breed B | G    | Scenario 1 |      |      | Scenario 5 |      |      |
|---------|------|------------|------|------|------------|------|------|
|         |      | BV         | Add  | Dom  | BV         | Add  | Dom  |
|         | 1    | 0.64       | 0.71 | 0.15 | 0.79       | 0.61 | 0.36 |
|         | 2    | 0.45       | 0.58 | 0.13 | 0.60       | 0.44 | 0.22 |
|         | 3    | 0.35       | 0.50 | 0.11 | 0.49       | 0.38 | 0.19 |
|         | 4    | 0.28       | 0.45 | 0.12 | 0.40       | 0.34 | 0.22 |
|         | 5    | 0.26       | 0.43 | 0.15 | 0.32       | 0.30 | 0.22 |
|         | Mean | 0.40       | 0.53 | 0.13 | 0.52       | 0.41 | 0.24 |

**G:** generation

**BV:** Accuracy of breeding values that is correlation between TBVC and GEBVC

**Add:** Accuracy of breeding values due to additive effects. **Dom:** Accuracy of breeding values due to dominance effects.

**Scenario 1:** Separate training in both breed A and B.

**Scenario 5:** Training on crossbred animals with phenotypes and genotypes. Two types of heterozygotes were assumed the same in crossbred animals.
